# Supplementary material for: Easy Express Extraction (TripleE)—A Universal, Electricity-Free Nucleic Acid Extraction System for the Lab and the Pen
Source: MDPI journal article supplement (doi:10.3390/microorganisms10051074), 2022-05-23
Supplement: s1 [file s1]

**Table S1.** Summary of all four extraction methods.

| Extraction         | KingFisher Flex System             | IndiMag 48 system                                     | TripleE easy-lab                                      | TripleE point-of-care                                 |
|--------------------|------------------------------------|-------------------------------------------------------|-------------------------------------------------------|-------------------------------------------------------|
| Extraction kit     | NucleoMag VET kit (Macherey-Nagel) | IndiMag Pathogen Kit w/o plastic (Indical Bioscience) | IndiMag Pathogen Kit w/o plastic (Indical Bioscience) | IndiMag Pathogen Kit w/o plastic (Indical Bioscience) |
| Maximal throughput | 96                                 | 48                                                    | 8                                                     | 8                                                     |
| Sample load        | 100 µl                             |                                                       |                                                       |                                                       |
| Proteinase K       | 20 µl                              |                                                       |                                                       |                                                       |
| Magnetic beads     | 20 µl NucleoMag B-Beads            | 25 µl MagAttract Suspension G                         | 25 µl MagAttract Suspension G                         | 25 µl MagAttract Suspension G                         |
| Lysis buffer       | 100 µl VL1                         | 100 µl VXL                                            | 100 µl VXL                                            | 100 µl VXL                                            |
| Binding buffer     | 350 µl VEB                         | 400 µl ACB                                            | 400 µl ACB                                            | 400 µl ACB                                            |
| Wash 1             | 600 µl VEW 1                       | 700 µl AW1                                            | 500 µl AW1                                            | 500 µl AW1                                            |
| Wash 2             | 600 µl VEW 2                       | 700 µl AW2                                            | 500 µl AW1                                            | 500 µl AW1                                            |
| Wash 3             | 600 µl EOTH 80 %                   | -                                                     | 500 µl AW2                                            | 500 µl AW2                                            |
| Wash 4             | -                                  | -                                                     | 500 µl EOTH 80 %                                      | 500 µl EOTH 80 %                                      |
| Elution            | 100 µl VEL                         | 100 µl AVE                                            | 100 µl AVE                                            | 100 µl AVE                                            |
| Extraction time    |                                    |                                                       |                                                       |                                                       |
| Incubation         | 5 min                              | 1 min                                                 | 3 min                                                 | 1 min                                                 |
| Run                | 20 min                             | 31 min                                                | 7 min                                                 | 5 min                                                 |
| Total              | 25 min                             | 32 min                                                | 10 min                                                | 6 min                                                 |
